# Supplementary material for: Nanofiber fabric based ion-gradient-enhanced moist-electric generator with a sustained voltage output of 1.1 volts
Source: Royal Society of Chemistry journal article supplement (doi:10.1039/d1mh00565k), 2021-01-01
Supplement: d1mh00565k2.pdf [file d1mh00565k2.pdf]

## Supporting Information

### **Nanofiber fabric based ion-gradient-enhanced moist-electric generator with a sustained voltage output of 1.1 volts**

Zhaoyang Sun<sup>a</sup>, Lanlan Feng<sup>a</sup>, Xian Wen<sup>a</sup>, Liming Wang<sup>a,\*</sup>, Xiaohong Qin<sup>a,\*</sup>, Jianyong Yu<sup>b</sup>

<sup>a</sup> *Key Laboratory of Textile Science & Technology, Ministry of Education, College of Textiles, Donghua University, Shanghai 201620, China*

<sup>b</sup> *Innovation Center for Textile Science and Technology, Donghua University, Shanghai 201620, China*

\* Corresponding authors.

E-mail addresses: wangliming@dhu.edu.cn (L. Wang), xhqin@dhu.edu.cn (X. Qin)

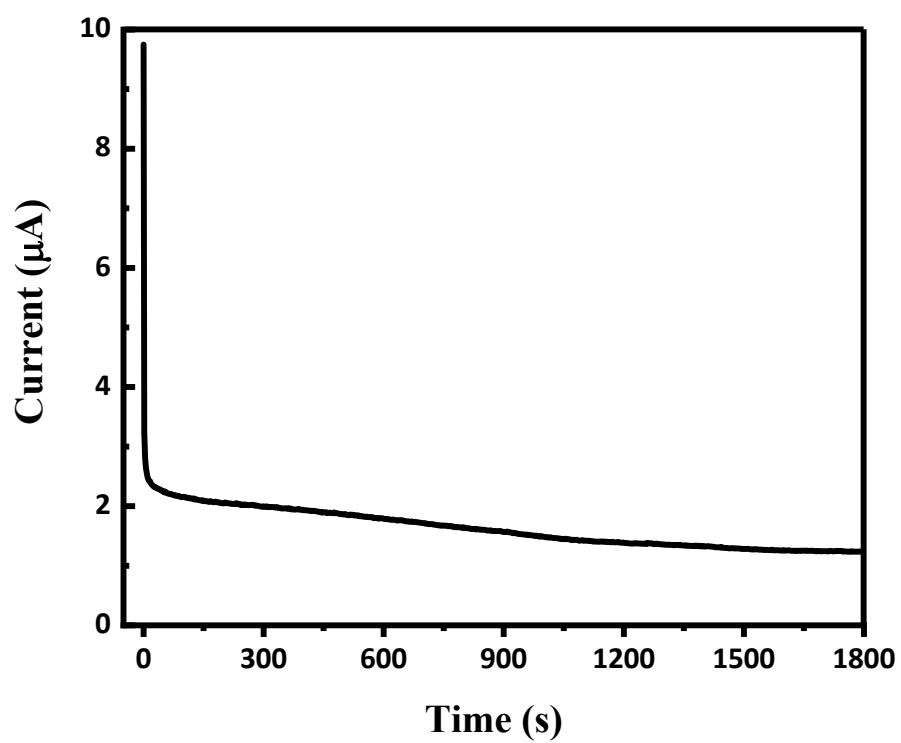

**Fig. S1.** Current output of PAN/PSSA (5:1) nanofiber fabric based MEG.

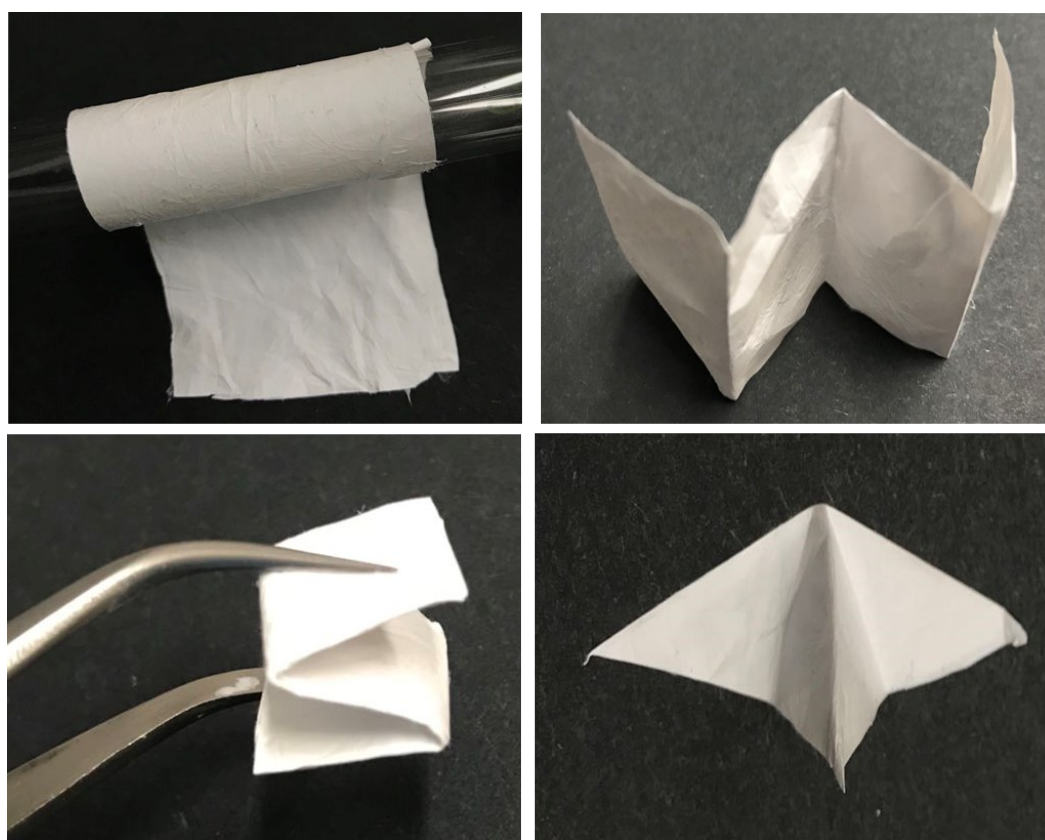

**Fig. S2.** Digital photos of the prepared large-area, flexible and deformable PAN/PSSA nanofiber fabric.

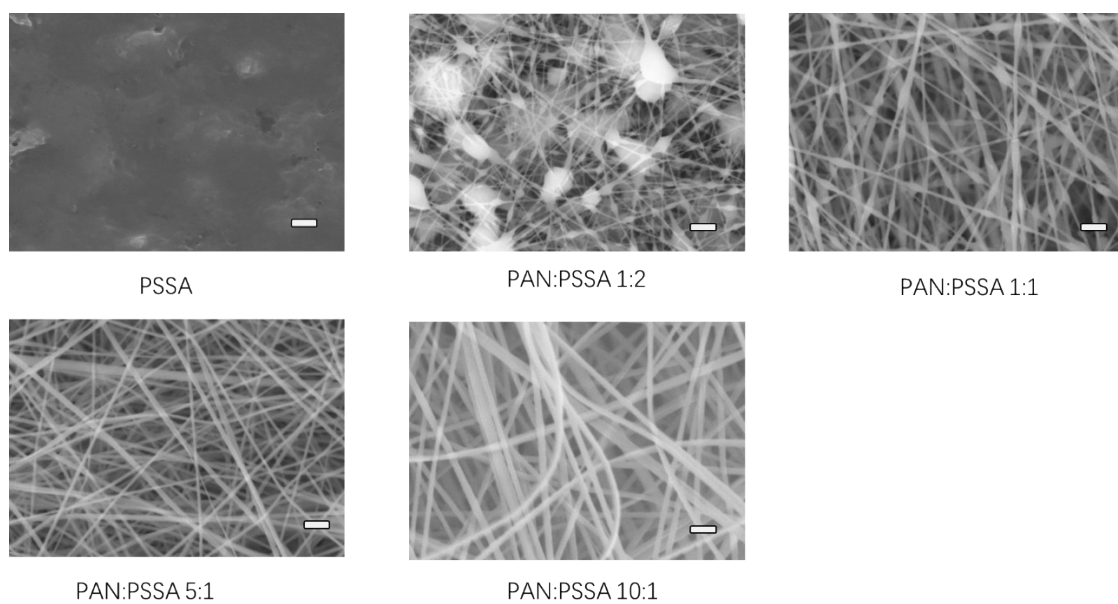

**Fig. S3.** SEM images of PSSA and PAN/PSSA nanofiber fabrics with different doping ratio. All the scale bars are 1  $\mu\text{m}$ .

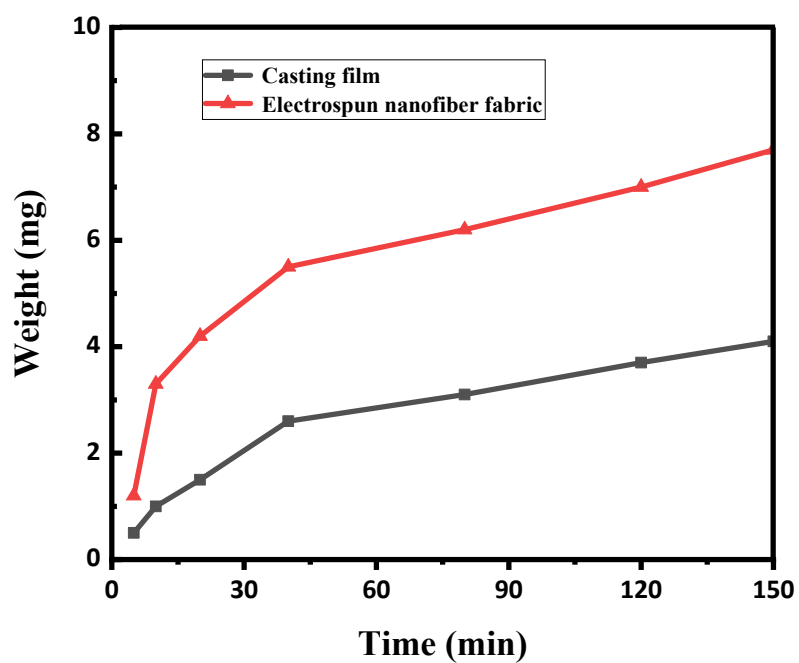

**Fig. S4.** The difference in moisture harvest for electrospun PAN/PSSA (5:1) nanofiber fabric and casted PAN/PSSA (5:1) film.

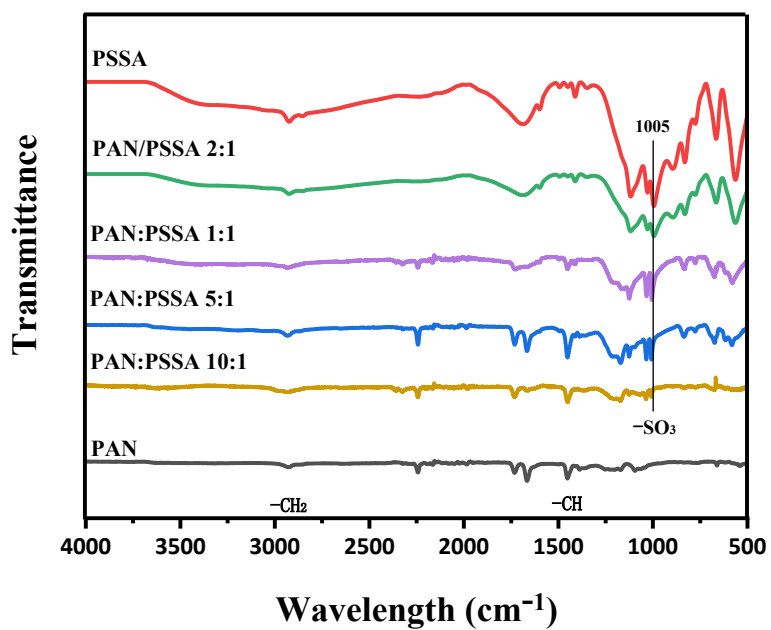

**Fig. S5.** FTIR spectra of PAN, PSSA and PAN/PSSA with different ratios.

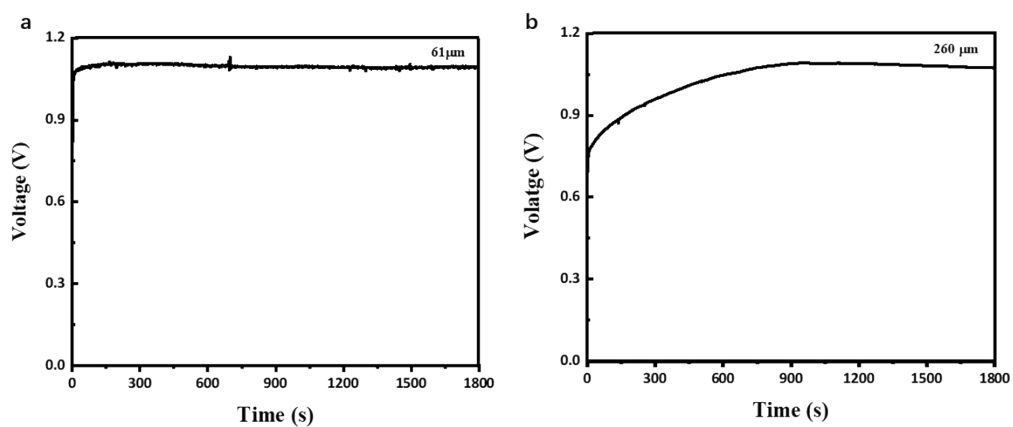

**Fig. S6.** Voltage output of PAN:PSSA (5:1) nanofiber fabric with thickness around (a) 61 μm, and (b) 260 μm. The thickness was controlled by changing electrospinning time from 2 h to 10 h.

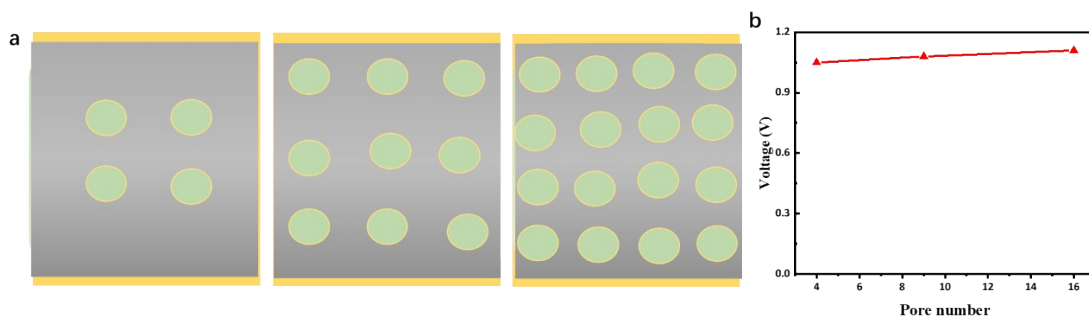

**Fig. S7.** (a) Schematic diagram of ion-gradient-enhanced MEG with different pore on top electrode and (b) their voltage outputs.

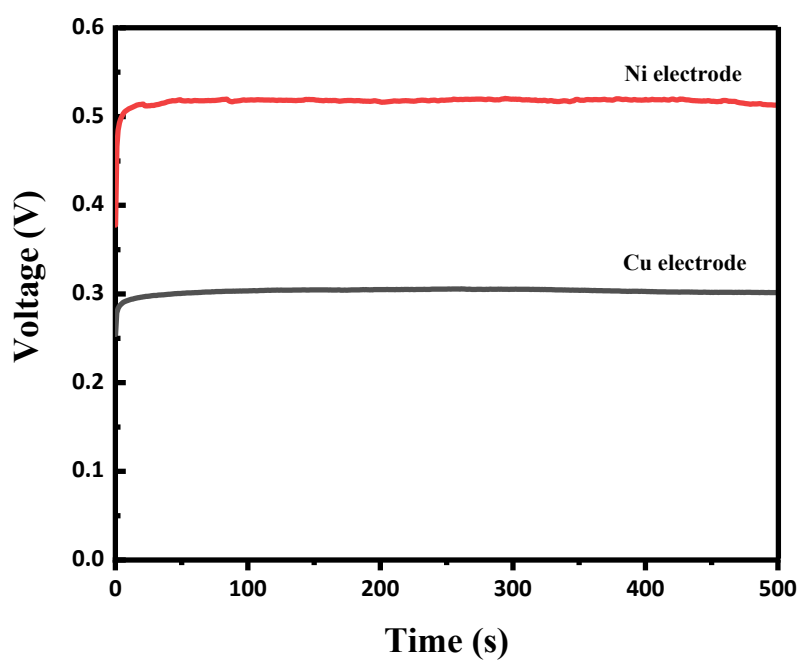

**Fig. S8.** Voltage outputs of PAN/PSSA of 5:1 under RH~80% and 25 °C with different top porous metal electrodes.

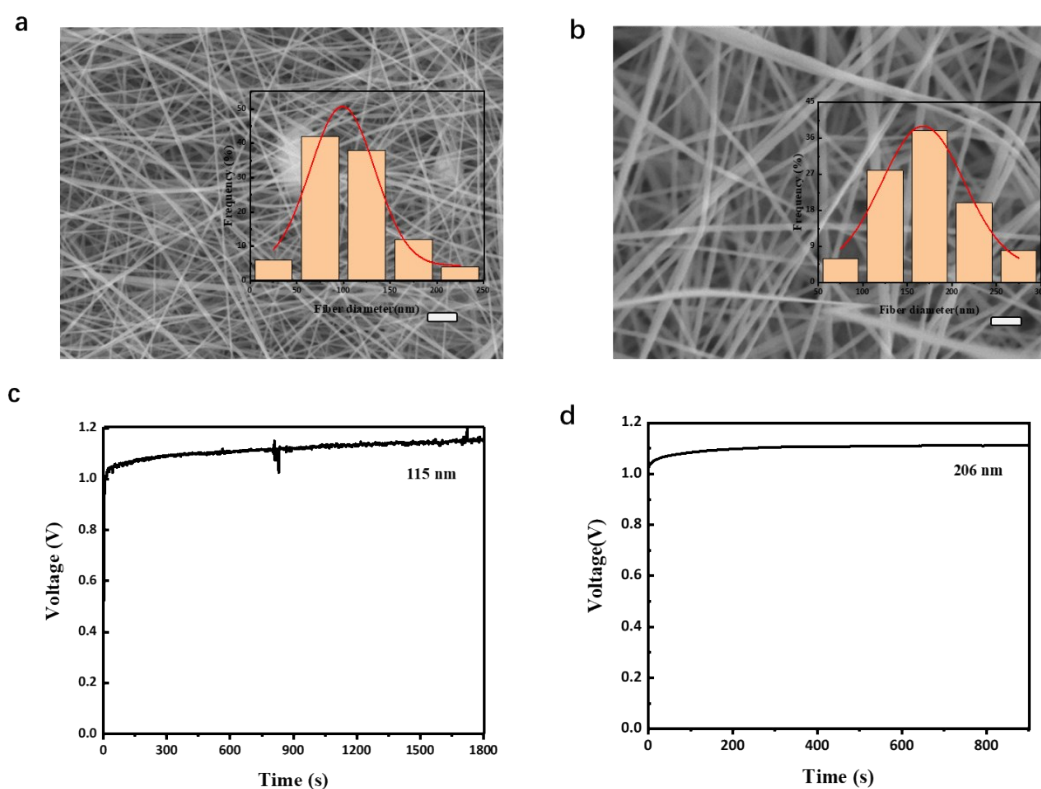

**Fig. S9.** (a, b) SEM images and (c, d) voltage outputs of PAN/PSSA (5:1) nanofiber fabrics with different fiber diameters. (a, c) Average diameter around 115 nm. (b, d). Average diameter around 206 nm. All the scale bars are 1  $\mu\text{m}$ . The fiber diameter was adjusted by changing applied voltage in electrospinning process. The applied voltages were 13 kV and 20 kV for producing fibers with diameter of 206 nm and 115 nm, respectively.

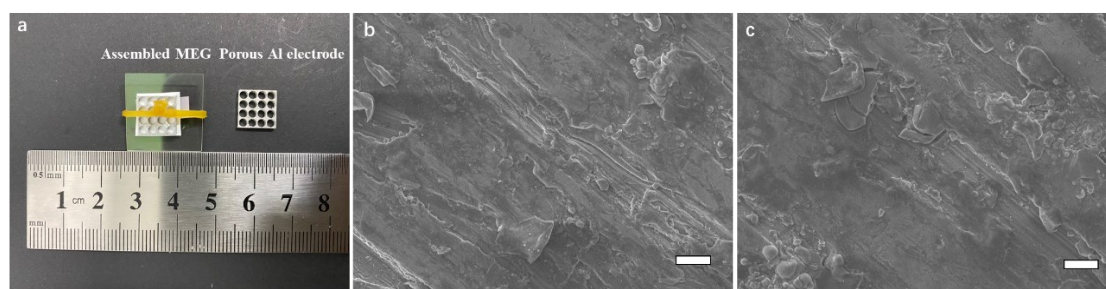

**Fig. S10.** (a) Digital photo picture of assembled MEG and the top porous Al electrode. (b, c) SEM images of porous Al electrode before the long-term test of 40000 s and after the long-term test, and the surface morphology is without any change. All scale bars are 20  $\mu\text{m}$ .

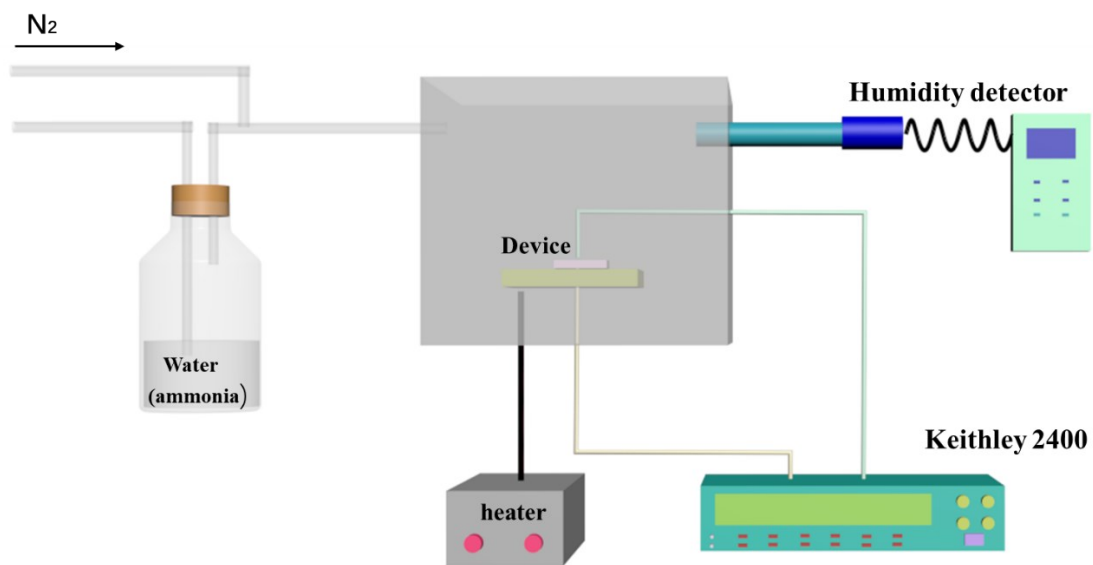

**Fig. S11.** Schematic diagram of home-built moisture circulating system.

**Table S1.** Summary of recent rising MEGs.

| Ref.            | Material        | Form                                | Maintain time without recharge (one burst) | Voltage      | Current density                                      |
|-----------------|-----------------|-------------------------------------|--------------------------------------------|--------------|------------------------------------------------------|
| 1               | GO              | Film                                | 10s                                        | 0.026 V      | 5 $\mu\text{A cm}^{-1}$                              |
| 2               | GO              | Printed film                        | 100s                                       | 0.45 V       | 2 $\mu\text{A cm}^{-1}$                              |
| 3               | GO              | 3D-aerogel                          | 2s                                         | 0.3 V        | 3.5 mA $\text{cm}^{-1}$                              |
| 4               | GO              | Fiber shape                         | 60s                                        | 0.3 V        | 0.7 $\mu\text{A cm}^{-1}$                            |
| 5               | GO              | film                                | 100s                                       | 0.4V         | 2 $\mu\text{A cm}^{-1}$                              |
| 6               | Carbon          | Carbon dots on paper                | 900s                                       | 0.04 V       | 0.142 $\mu\text{A cm}^{-1}$                          |
| 7               | PPy             | Nanowire                            | 2s                                         | 0.072 V      | 0.14 $\mu\text{A cm}^{-1}$                           |
| 8               | PPy             | 3D framework                        | 7s                                         | 0.06V        | 2.5 $\mu\text{A cm}^{-1}$                            |
| 9               | PSSA            | Membrane                            | At least 1600s                             | 0.8 V        | 0.15 mA $\text{cm}^{-1}$                             |
| 10              | Cellulose       | Paper                               | 400s                                       | 0.25 V       | 15 nA $\text{cm}^{-1}$                               |
| 11              | Protein         | Nanowires                           | Self-recharging                            | 0.5 V        | 115 nA $\text{cm}^{-1}$                              |
| 12              | Silk            | nanofiber                           | 600s                                       | 0.13 V       | 0.1 $\mu\text{A cm}^{-1}$                            |
| <b>Our work</b> | <b>PAN/PSSA</b> | <b>Electrospun nanofiber fabric</b> | <b>Over 40000s</b>                         | <b>1.1 V</b> | <b>1.35 <math>\mu\text{A cm}^{-1}\text{A}</math></b> |

## References

- [1] F. Zhao, H. Cheng, Z. Zhang, L. Jiang, L. Qu, Direct Power Generation from a Graphene Oxide Film under Moisture, *Adv. Mater.*, 27 (2015) 4351–4357.
- [2] Y. Liang, F. Zhao, Z. Cheng, Y. Deng, Y. Xiao, H. Cheng, P. Zhang, Y. Huang, H. Shao, L. Qu, Electric power generation via asymmetric moisturizing of graphene oxide for flexible, printable and portable electronics, *Energy Environ. Sci.*, 11 (2018) 1730–1735.
- [3] F. Zhao, Y. Liang, H. Cheng, L. Jiang, L. Qu, Highly efficient moisture-enabled electricity generation from graphene oxide frameworks, *Energy Environ. Sci.*, 9 (2016) 912–916.
- [4] C. Shao, J. Gao, T. Xu, B. Ji, Y. Xiao, C. Gao, Y. Zhao, L. Qu, Wearable fiberform hygroelectric generator, *Nano Energy*, 53 (2018) 698–705.
- [5] T. Xu, X. Ding, C. Shao, L. Song, T. Lin, X. Gao, J. Xue, Z. Zhang, and L. Qu, Electric Power Generation through the Direct Interaction of Pristine Graphene-Oxide with Water Molecules. *Small*, 14 (2018) 1704473.
- [6] Q. Li, M. Zhou, Q. Yang, M. Yang, Q. Wu, Z. Zhang, J. Yu, Flexible carbon dots composite paper for electricity generation from water vapor absorption, *J. Mater. Chem. A.*, 6 (2018) 10639–10643.
- [7] N. Chen, Q. Liu, C. Liu, G. Zhang, J. Jing, C. Shao, Y. Han, L. Qu, MEG actualized by high-valent metal carrier transport, *Nano Energy*, 65 (2019) 104047.



- [8] J. Xue, F. Zhao, C. Hu, Y. Zhao, H. Luo, L. Dai, and L. Qu, Vapor-Activated Power Generation on Conductive Polymer, *Adv. Funct. Mater.* 26 (2016) 8784–8792.
- [9] T. Xu, X. Ding, Y. Huang, C. Shao, L. Song, X. Gao, Z. Zhang, L. Qu, An efficient polymer moist-electric generator, *Energy Environ. Sci.*, 12 (2019) 972—978.
- [11] H. Wang, H. Cheng, Y. Huang, C. Yang, D. Wang, C. Li, L. Qu, Transparent, self-healing, arbitrary tailorable moist-electric film generator, *Nano energy*, 67 (2020), 104238.
- [10] X. Gao, T. Xu, C. Shao, Y. Han, B. Lu, Z. Zhang, L. Qu, Electric power generation using paper materials, *J. Mater. Chem. A.*, 7 (2019) 20574–20578.
- [11] X. Liu, H. Gao, J. Ward, X. Liu, B. Yin, T. Fu, J. Che, D. Lovley, J. Yao, Power generation from ambient humidity using protein nanowires, *Nature*, 578 (2020), 550–554.
- [12] W. Yang, L. Lv, X. Li, X. Han, M. Li, and C. Li, Qatarized Silk Nanofibrils for Electricity Generation from Moisture and Ion Rectification, *ACS Nano*, 14 (2020) 10600–10607.
